# Supplementary material for: A Single and Un-Adjuvanted Dose of a Chimpanzee Adenovirus-Vectored Vaccine against Chikungunya Virus Fully Protects Mice from Lethal Disease
Source: PubMed Central journal article supplement (PMC6963200; doi:10.3390/pathogens8040231), 2019-11-12
Supplement: pathogens-08-00231-s001.pdf [file pathogens-08-00231-s001.pdf]

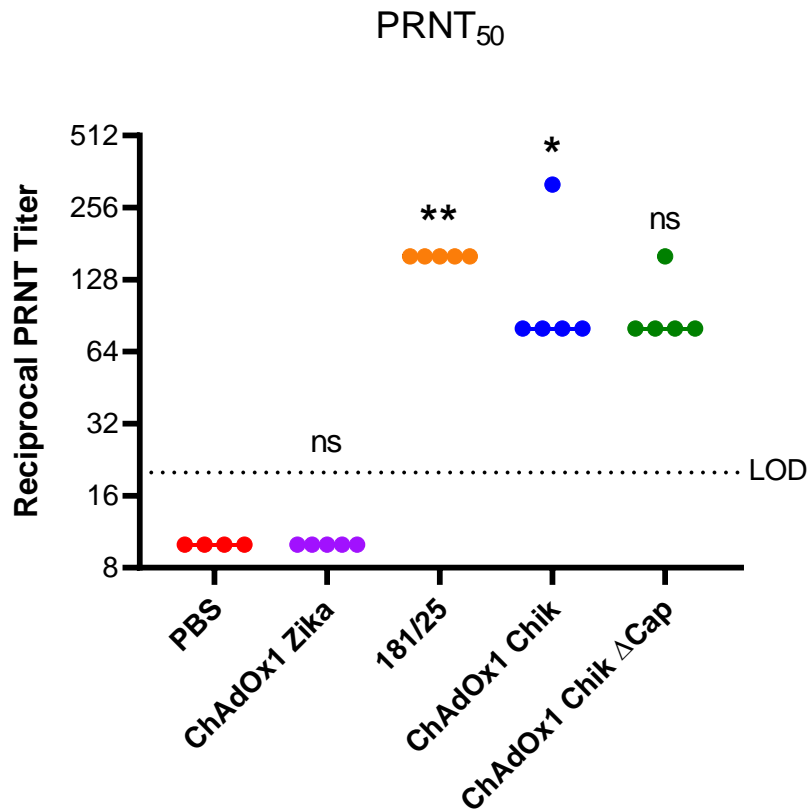

**Figure 1.** ChAdOx1 Chik and ChAdOx1 Chik  $\Delta$ Cap vaccines induce neutralizing antibody titers comparable to those induced by 181/25. PRNT titers on day 25 post vaccination. Horizontal dashed line represents the limit of detection (LOD) of the assay of 20. All values recorded as 10 had neutralization values <LOD. Reciprocal PRNT titers representing 50% neutralization (PRNT<sub>50</sub>). Dots represent titers for each animal, bars represent mean and SEM. One-way ANOVA with Dunnett's (vs PBS); \* $p < 0.05$ , \*\* $p < 0.01$ .
